# Supplementary material for: Potent inhibition of microRNA in vivo without degradation
Source: PubMed Central journal article supplement — Nucleic Acids Res. 2008 Nov 16;37(1):70–7. doi: 10.1093/nar/gkn904 (PMC2615630; doi:10.1093/nar/gkn904), 2008-11-16
Supplement: gkn904_1.pdf [file gkn904_1.pdf]

Supplementary Figure 1

| Chemistry          | Modification property     | Modification pattern                                                                                                                                                                                                                                                                                                                                                                                                                                                                  | T <sub>m</sub> |
|--------------------|---------------------------|---------------------------------------------------------------------------------------------------------------------------------------------------------------------------------------------------------------------------------------------------------------------------------------------------------------------------------------------------------------------------------------------------------------------------------------------------------------------------------------|----------------|
| 2'-MOE             | High affinity, 2' sugar   | 5'-A <sub>s</sub> <sup>m</sup> C <sub>s</sub> A <sub>s</sub> A <sub>s</sub> A <sub>s</sub> <sup>m</sup> C <sub>s</sub> A <sub>s</sub> <sup>m</sup> C <sub>s</sub> <sup>m</sup> C <sub>s</sub> A <sub>s</sub> T <sub>s</sub> T <sub>s</sub> G <sub>s</sub> T <sub>s</sub> <sup>m</sup> C <sub>s</sub> A <sub>s</sub> <sup>m</sup> C <sub>s</sub> A <sub>s</sub> <sup>m</sup> C <sub>s</sub> T <sub>s</sub> <sup>m</sup> C <sub>s</sub> <sup>m</sup> C <sub>s</sub> A-3'                | 78.9           |
| F-MOE              | High affinity, 2' sugar   | 5'-A <sub>s</sub> <sup>m</sup> C <sub>s</sub> A <sub>s</sub> A <sub>s</sub> A <sub>s</sub> <sup>m</sup> C <sub>s</sub> A <sub>s</sub> <sup>m</sup> C <sub>s</sub> A <sub>s</sub> <sup>m</sup> C <sub>s</sub> A <sub>s</sub> U <sub>s</sub> U <sub>s</sub> G <sub>s</sub> U <sub>s</sub> C <sub>s</sub> A <sub>s</sub> <sup>m</sup> C <sub>s</sub> A <sub>s</sub> <sup>m</sup> C <sub>s</sub> U <sub>s</sub> C <sub>s</sub> A-3'                                                       | 80.7           |
| DMAEOE/ 2'-MOE     | Charged group, 2 sugar    | 5'-A <sub>s</sub> <sup>m</sup> C <sub>s</sub> A <sub>s</sub> A <sub>s</sub> A <sub>s</sub> <sup>m</sup> C <sub>s</sub> A <sub>s</sub> <sup>m</sup> C <sub>s</sub> A <sub>s</sub> <sup>m</sup> C <sub>s</sub> A <sub>s</sub> T <sub>s</sub> T <sub>s</sub> G <sub>s</sub> T <sub>s</sub> <sup>m</sup> C <sub>s</sub> A <sub>s</sub> <sup>m</sup> C <sub>s</sub> A <sub>s</sub> <sup>m</sup> C <sub>s</sub> T <sub>s</sub> <sup>m</sup> C <sub>s</sub> <sup>m</sup> C <sub>s</sub> A-3' | 71.6           |
| Tri-MOE/ 2'-MOE    | Bulk, 2' sugar            | 5'-A <sub>s</sub> <sup>m</sup> C <sub>s</sub> A <sub>s</sub> A <sub>s</sub> A <sub>s</sub> <sup>m</sup> C <sub>s</sub> A <sub>s</sub> <sup>m</sup> C <sub>s</sub> A <sub>s</sub> <sup>m</sup> C <sub>s</sub> A <sub>s</sub> T <sub>s</sub> T <sub>s</sub> G <sub>s</sub> T <sub>s</sub> <sup>m</sup> C <sub>s</sub> A <sub>s</sub> <sup>m</sup> C <sub>s</sub> A <sub>s</sub> <sup>m</sup> C <sub>s</sub> T <sub>s</sub> <sup>m</sup> C <sub>s</sub> <sup>m</sup> C <sub>s</sub> A-3' | 78.4           |
| Phenoxazine/ 2'MOE | High affinity, nucleobase | 5'-A <sub>s</sub> <sup>m</sup> C <sub>s</sub> A <sub>s</sub> A <sub>s</sub> A <sub>s</sub> <sup>m</sup> C <sub>s</sub> A <sub>s</sub> <sup>m</sup> C <sub>s</sub> A <sub>s</sub> <sup>m</sup> C <sub>s</sub> A <sub>s</sub> T <sub>s</sub> T <sub>s</sub> G <sub>s</sub> T <sub>s</sub> <sup>m</sup> C <sub>s</sub> A <sub>s</sub> <sup>m</sup> C <sub>s</sub> A <sub>s</sub> <sup>m</sup> C <sub>s</sub> T <sub>s</sub> <sup>m</sup> C <sub>s</sub> <sup>m</sup> C <sub>s</sub> A-3' | >95            |
| MMI-2'OMe/2'-MOE   | Neutral backbone          | 5'-A <sub>s</sub> <sup>m</sup> CA <sub>s</sub> A <sub>s</sub> A <sub>s</sub> <sup>m</sup> CA <sub>s</sub> <sup>m</sup> C <sub>s</sub> <sup>m</sup> C <sub>s</sub> AT <sub>s</sub> T <sub>s</sub> G <sub>s</sub> T <sub>s</sub> <sup>m</sup> CA <sub>s</sub> <sup>m</sup> CA <sub>s</sub> <sup>m</sup> C <sub>s</sub> T <sub>s</sub> <sup>m</sup> C <sub>s</sub> <sup>m</sup> CA-3'                                                                                                    | n/a            |

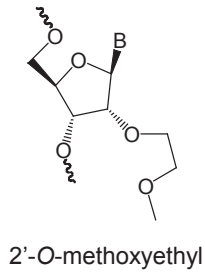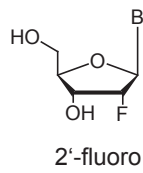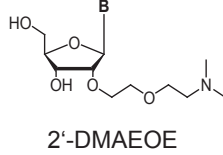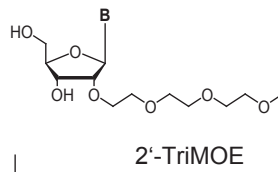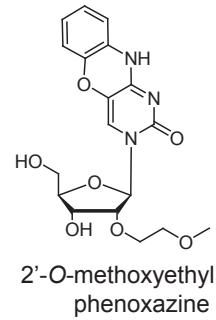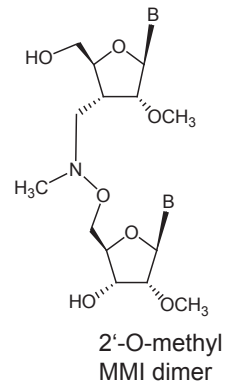

A

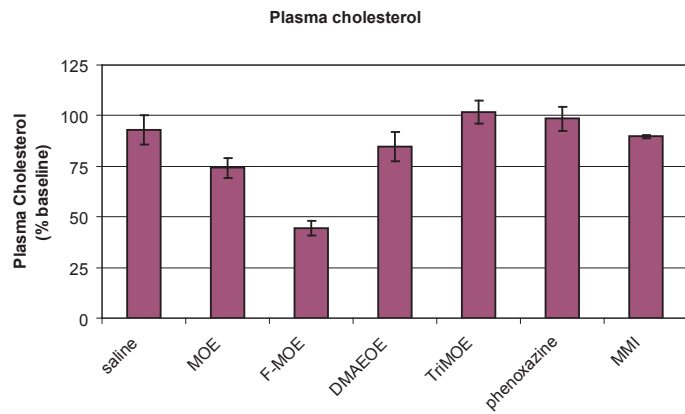

B

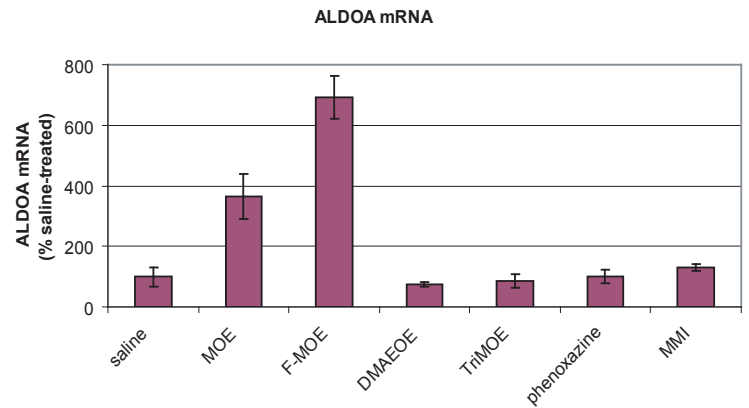

**A**

| Compound # | Sequence                |
|------------|-------------------------|
| 1          | ACAAACACCAUUGUCACACUCCA |
| 2          | ACAAACACCAUUGUCACACUCCA |
| 3          | ACAAACACCAUUGUCACACUCCA |
| 4          | ACAAACACCAUUGUCACACUCCA |
| 5          | ACAAACACCAUUGUCACACUCCA |
| 6          | ACAAACACCAUUGUCACACUCCA |
| 7          | ACAAACACCAUUGUCACACUCCA |
| 8          | ACAAACACCAUUGUCACACUCCA |

2'-MOE 2'-F

**B**

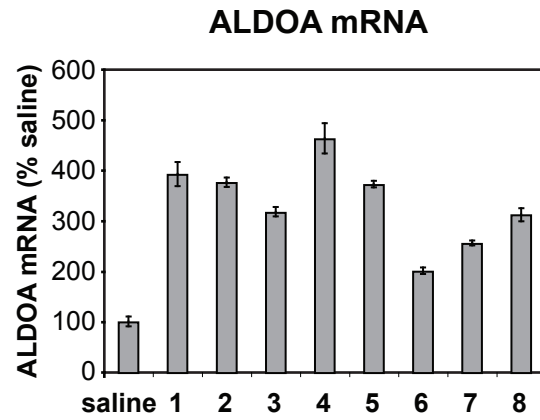

**C**

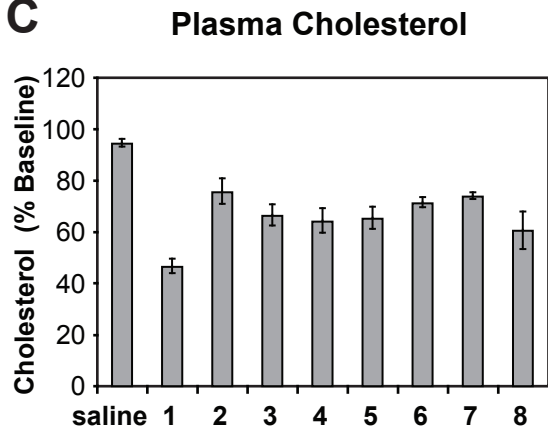

**D**

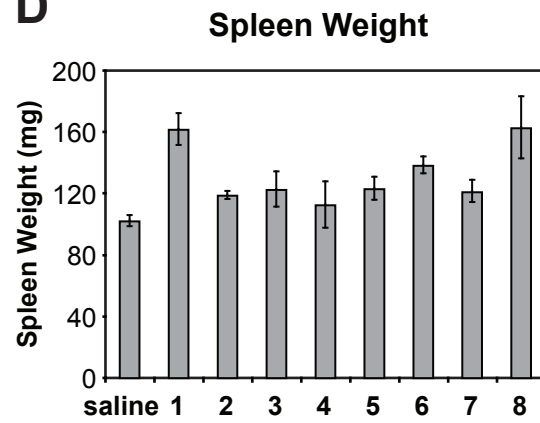

Supplementary Figure 3

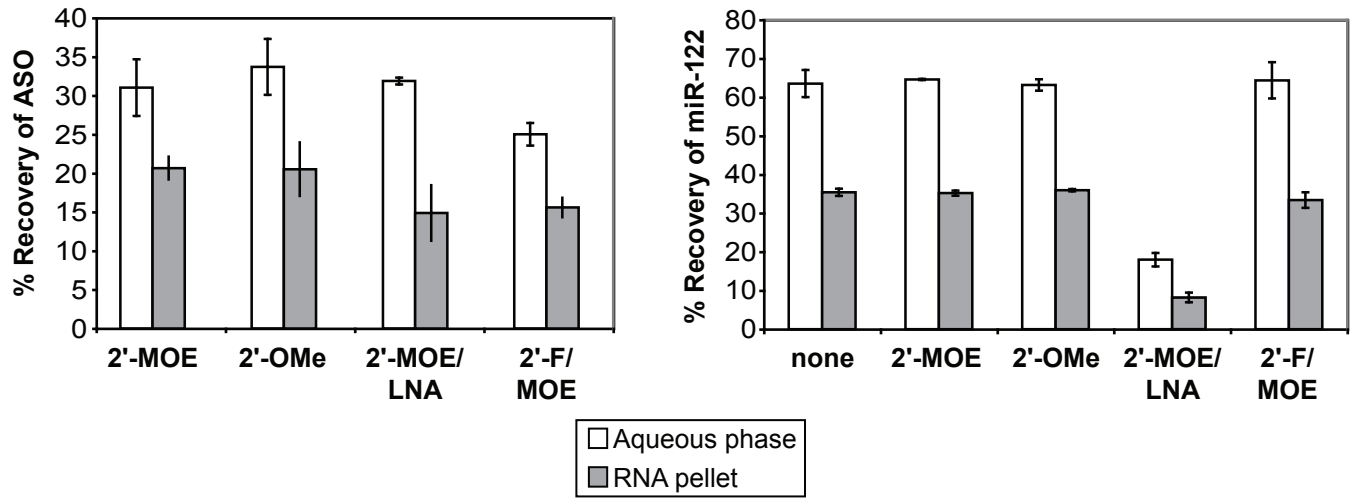

Supplementary Figure 4

**2'-MOE**

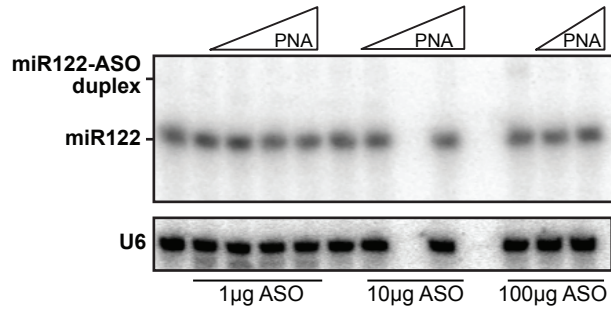

**2'-OMe**

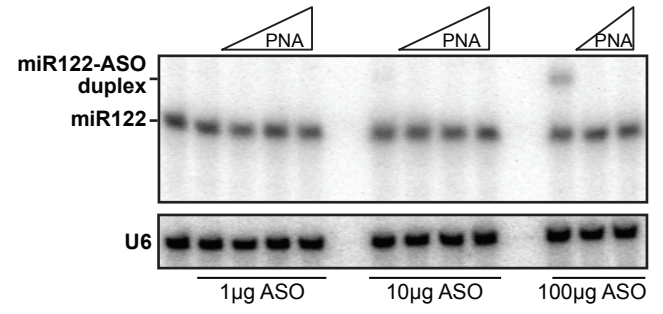

**2'-MOE/LNA**

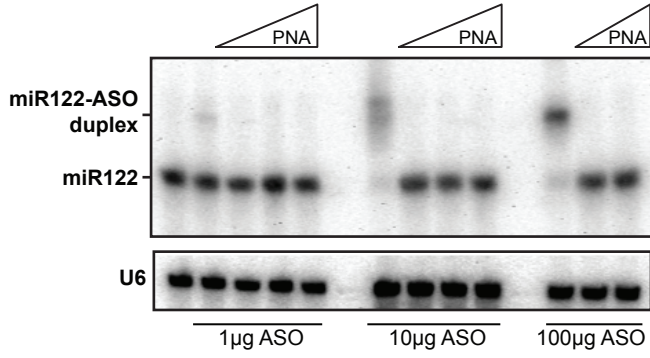

**2'-F/MOE**

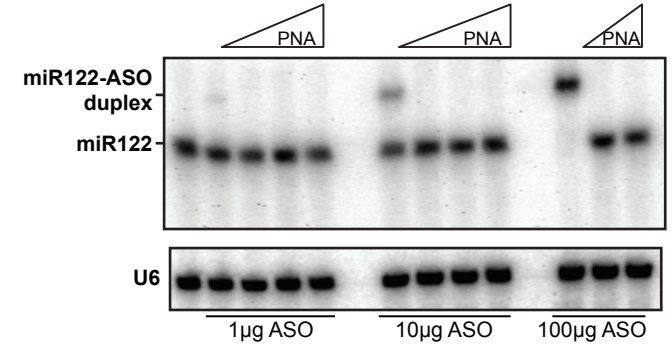

## **Supplementary Figure Legends**

### **Supplementary Figure 1** Evaluation of a panel of chemically-modified miR-122 ASOs.

Normal mice were treated i.p. with 25 mg/kg of miR-122 ASOs twice weekly for 3 weeks. n=4. Error=SEM (A) Plasma cholesterol levels. (B) Aldolase A mRNA levels in liver by RTPCR.

### **Supplementary Figure 2** Insertion of additional 2'-MOE modifications into the 2'-

F/MOE cap ASO ameliorates splenomegaly while retaining ASO activity. Normal mice were treated i.p. with 25 mg/kg of miR-122 ASOs twice weekly for 3 weeks. n=5. Error=SEM (a) Chemical composition of anti-miR ASOs incorporating additional 2'-MOE modifications into 2'-F/MOE ASO. (b) Real-time RT-PCR measuring levels of miR-122 target gene ALDOA in liver RNA. (c) Change in total plasma cholesterol levels. (d) Spleen weight at sacrifice.

### **Supplementary Figure 3** Recovery of ASOs and miR-122 in presence of ASOs through

Trizol purification process. (a) Recovery of radiolabeled ASOs after Trizol purification of liver RNA. (b) Recovery of radiolabeled miR-122 in presence of ASOs after Trizol purification of liver RNA.

### **Supplementary Figure 4** Competitor PNA has ability to free miR-122 from miR-122-

ASO duplex in mouse total liver RNA. The indicated ASOs were added to liver lysates and RNA was Trizol-purified. Radiolabeled miR-122 RNA was added to total RNA sample, RNA was separated by denaturing PAGE in presence of competitor PNA and transferred to membrane, which was exposed on a phosphoimager. Northern blotting for U6 was also performed for normalization.

**Supplementary Table 1** miR-122 inhibition by 2'-MOE and 2'-F/MOE ASOs *in vivo* has little effect on global expression of microRNAs. In one experiment, mice were treated i.p. with 75mg/kg of the 2'-MOE ASO twice weekly for 4 weeks and real time RT-PCR was used to measure the levels of 162 miRNAs in the liver compared to saline- or ASO-treated mice. In the second experiment, mice were treated with 5mg/kg of the 2'-F/MOE ASO twice weekly for six weeks and miRNA microarray profiling was performed.

## **Supplementary Methods**

### **ASO labeling and gel shift assay**

ASOs and miR-122 RNA were 5'-<sup>32</sup>P-labelled with T4 polynucleotide kinase and purified on Sephadex columns (Roche). Labeled ASOs were added into 1ml Trizol preparations containing 50mg mouse liver. Labeled miR-122 RNA was added into 1ml Trizol preparations containing 50mg liver and 10µg ASO. After Trizol purification, the percent recovery was determined by scintillation counting. For gel shift assays, <sup>32</sup>P-labeled miR-122 RNA was added into total RNA prepared from 50mg mouse liver containing 1, 10, or 100µg ASO. 10 µg total RNA in 1x TBE-Urea loading buffer (Invitrogen) was separated on a 15% TBE-Urea polyacrylamide gel (Invitrogen) in presence of PNA competitor and transferred to membrane, which was exposed on a phosphoimager. Northern blotting for U6 was also performed for normalization.

### **miRNA Profiling**

Total RNA extracted from whole liver tissue using miRNeasy kit (Qiagen). Array of 2'-MOE ASO treated samples was performed using Taqman microRNA Early Access kit

(Applied Biosystems). Array of 2'-F/MOE ASO treated samples performed by LCSciences (array version: miRRodentia\_9.1).
